# Supplementary material
Source: publisher site journal article supplement (https://www.dovepress.com/get_supplementary_file.php?f=421749.docx)
Supplement: Supplementary file 1 [file get_supplementary_file.php]

**Supplemental Table 1: Exploration of participants' age, family history, and weight status by sociodemographic and individual risk factors.**

| Variables | Variable category | Total n (%) | Age | | | | Weight status | | | | Family history of NCD | | |
| --- | --- | --- | --- | --- | --- | --- | --- | --- | --- | --- | --- | --- | --- |
| 18-40 | 41-55 | 56+ | P-value | Normal | Overweight | Obese | P-value | Yes | No | P-value |
| Gender | Male | 189 (45.3) | 136 (43.6) | 27 (50.9) | 26 (50.0) | 0.47 | 142 (49.0) | 37 (42.5) | 9 (25.7) | 0.02 | 83 (50.0) | 105 (42.0) | 0.10 |
| Female | 228 (54.7) | 176 (56.4) | 26 (49.1) | 26 (50.0) | 148 (51.0) | 50 (57.5) | 26(74.3) | 83 (50.0) | 145 (58.0) |
| Marital status | Married | 235 (56.4) | 164 (52.6) | 38 (71.7) | 33 (63.5) | 0.00 | 150 (51.7) | 58 (66.7) | 23 (65.7) | -- | 87 (52.4) | 148 (59.2) | 0.38 |
| Others | 47 (11.3) | 15 (4.8) | 13 (24.5) | 19 (36.5) | 21 (7.2) | 13 (14.9) | 12 (34.3) | 20 (12.0) | 27 (10.8) |
| Single | 135 (32.4) | 133 (42.6) | 2 (3.8) | 0 (0.0) | 119 (41.0) | 16 (18.4) | 0 (0.0) | 59 (35.5) | 75 (30.0) |
| Education | Primary or lower | 94 (22.5) | 39 (12.5) | 27 (50.9) | 28 (53.8) | 0.00 | 53 (18.3) | 25 (28.7) | 14 (40.0) | 0.01 | 46 (27.7) | 48 (19.2) | 0.08 |
| Some/secondary | 96 (23.0) | 77 (24.7) | 12 (22.6) | 7 (13.5) | 71 (24.5) | 15 (17.2) | 10 (28.6) | 32 (19.3) | 64 (25.6) |
| Post-secondary | 73 (17.5) | 65 (20.8) | 5 (9.4) | 3 (5.8) | 47 (16.2) | 20 (23.0) | 3 (8.6) | 24 (14.5) | 49 (19.6) |
| Degree and above | 154 (36.9) | 131 (42.0) | 9 (17.0) | 14 (26.9) | 119 (41.0) | 27 (31.0) | 8 (22.9) | 64 (38.6) | 89 (35.6) |
| Occupation | Securely employed | 137 (32.9) | 115 (36.9) | 14 (26.4) | 8 (15.4) | -- | 104 (35.9) | 23 (26.4) | 9 (25.7) | 0.04 | 59 (35.5) | 78 (31.2) | 0.49 |
| Unemployed | 121 (29.0) | 100 (32.1) | 0 (0.0) | 21 (40.4) | 91 (31.4) | 21 (24.1) | 9 (25.7) | 49 (29.5) | 71 (28.4) |
| Insecure jobs | 159 (38.1) | 97 (31.1) | 39 (73.6) | 23 (44.2) | 95 (32.8) | 43 (49.4) | 17 (48.6) | 58 (34.9) | 101 (40.4) |
| Income (ETB) | Less than 2250 | 53 (13.7) | 39 (13.6) | 9 (18.0) | 5 (10.0) | 0.84 | 41 (15.2) | 9 (11.5) | 3 (8.6) | 0.60 | 21 (13.0) | 32 (14.2) | 0.59 |
| 2251-5000 | 126 (32.6) | 93 (32.4) | 16 (32.0) | 17 (34.0) | 88 (32.6) | 23 (29.5) | 14 (40.0) | 49 (30.2) | 77 (34.2) |
| 5001 and above | 208 (53.9) | 155 (54.0) | 25 (50.0) | 28 (56.0) | 141 (52.2) | 46 (59.0) | 18 (51.4) | 92 (56.8) | 116 (51.6) |
| Health care afford | Yes | 266 (63.8) | 203 (65.1) | 35 (66.0) | 28 (53.8) | 0.27 | 182 (62.8) | 57 (65.5) | 23 (65.7) | 0.86 | 96 (57.8) | 170 (68.0) | 0.03 |
| No | 151 (36.2) | 109 (34.9) | 18 (34.0) | 24 (46.2) | 108 (37.2) | 30 (34.5) | 12 (34.3) | 70 (42.2) | 80 (32.0) |
| Family history | Yes | 166 (39.8) | 110 (35.4) | 22 (41.5) | 34 (65.4) | 0.00 | 122 (42.2) | 27 (31.0) | 14 (40.0) | 0.17 | - | - | - |
| No | 251 (60.2) | 201 (64.6) | 31 (58.5) | 18 (34.6) | 167 (57.8) | 60 (69.0) | 21 (60.0) | - | - |
| Fruits/vegetables intake | Adeqaute | 18 (4.3) | 13 (4.5) | 5 (5.7) | 0 (0.0) | 0.36 | 15 (4.8) | 1 (1.9) | 2 (3.8) | 0.62 | 6 (3.6) | 12 (4.8) | 0.56 |
| Inadeqaute | 399 (95.7) | 277 (95.5) | 82 (94.3) | 35 (100.0) | 297 (95.2) | 52 (98.1) | 50 (96.2) | 160 (96.4) | 238 (95.2) |
| Salt intake (daily) | Yes | 366 (87.8) | 283 (90.7) | 39 (73.6) | 44 (84.6) | 0.01 | 257 (88.6) | 73 (83.9) | 33 (94.3) | 0.24 | 135 (81.3) | 230 (92.0) | 0.01 |
| No | 51 (12.2) | 29 (9.3) | 14 (26.4) | 8 (15.4) | 33 (11.4) | 14 (16.1) | 2 (5.7) | 31 (18.7) | 20 (8.0) |
| Sweet foods intake (daily) | No | 281 (67.4) | 197 (63.1) | 41 (77.4) | 43 (82.7) | 0.01 | 195 (67.2) | 60 (69.0) | 22 (62.9) | 0.80 | 124 (74.7) | 156 (62.4) | 0.01 |
| Yes | 136 (32.6) | 115 (36.9) | 12 (22.6) | 9 (17.3) | 95 (32.8) | 27 (31.0) | 13 (37.1) | 42 (25.3) | 94 (37.6) |
| Physical activity | Active | 259 (62.1) | 200 (64.1) | 31 (58.5) | 28 (53.8) | 0.31 | 188 (64.8) | 49 (56.3) | 20 (57.1) | 0.28 | 108 (65.1) | 150 (60.0) | 0.29 |
| Inactive | 158 (37.9) | 112 (35.9) | 22 (41.5) | 24 (46.2) | 102 (35.2) | 38 (43.7) | 15 (42.9) | 58 (34.9) | 100 (40.0) |
| Alcohol consumption | Yes | 221 (53.0) | 178 (57.1) | 23 (43.4) | 20 (38.5) | 0.01 | 165 (56.9) | 43 (49.4) | 10 (28.6) | 0.01 | 83 (50.0) | 138 (55.2) | 0.29 |
| No | 196 (47.0) | 134 (42.9) | 30 (56.6) | 32 (61.5) | 125 (43.1) | 44 (50.6) | 25 (71.4) | 83 (50.0) | 112 (44.8) |
| Tobacco use | Yes | 8 (1.9) | 306 (98.1) | 52 (98.1) | 51 (98.1) | -- | 283 (97.6) | 86 (98.9) | 35 (100.0) | -- | 163 (98.2) | 245 (98.0) | -- |
| No | 409 (98.1) | 6 (1.9) | 1 (1.9) | 1 (1.9) | 7 (2.4) | 1 (1.1) | 0 (0.0) | 3 (1.8) | 5 (2.0) |
| Kchat chewing | Yes | 21 (5.0) | 301 (96.5) | 49 (92.5) | 46 (88.5) | 0.03 | 277 (95.5) | 80 (92.0) | 34 (97.1) | 0.34 | 157 (94.6) | 238 (95.2) | 0.77 |
| No | 396 (95.0) | 11 (3.5) | 4 (7.5) | 6 (11.5) | 13 (4.5) | 7 (8.0) | 1 (2.9) | 9 (5.4) | 12 (4.8) |
| Individual risk factor score | 0-1 | 107 (25.7) | 78 (25.0) | 14 (26.4) | 15 (28.8) | 0.84 | 77 (26.6) | 17 (19.5) | 13 (37.1) | 0.13 | 49 (29.5) | 57 (22.8) | 0.29 |
| 2 | 223 (53.5) | 170 (54.5) | 29 (54.7) | 24 (46.2) | 147 (50.7) | 54 (62.1) | 18 (51.4) | 83 (50.0) | 140 (56.0) |
| 3-4 | 87 (20.9) | 64 (20.5) | 10 (18.9) | 13 (25.0) | 66 (22.8) | 16 (18.4) | 4 (11.4) | 34 (20.5) | 53 (21.2) |
| Wellbeing | Low | 146 (35.1) | 101 (32.5) | 26 (49.1) | 19 (36.5) | 0.22 | 92 (31.8) | 36 (41.4) | 13 (37.1) | 0.18 | 62 (37.6) | 83 (33.2) | 0.19 |
| Average | 125 (30.0) | 96 (30.9) | 13 (24.5) | 16 (30.8) | 98 (33.9) | 19 (21.8) | 8 (22.9) | 54 (32.7) | 71 (28.4) |
| High | 145 (34.9) | 114 (36.7) | 14 (26.4) | 17 (32.7) | 99 (34.3) | 32 (36.8) | 14 (40.0) | 49 (29.7) | 96 (38.4) |
| Overweight/obesity | Normal | 290 (70.4) | 230 (74.9) | 30 (56.6) | 30 (57.7) | 0.00 | - | - | - | - | 122 (74.8) | 167 (67.3) | 0.17 |
| Overweight | 87 (21.1) | 61 (19.9) | 15 (28.3) | 11 (21.2) | - | - | - | 27 (16.6) | 60 (24.2) |
| Obese | 35 (8.5) | 16 (5.2) | 8 (15.1) | 11 (21.2) | - | - | - | 14 (8.6) | 21 (8.5) |
| Central obesity | Low | 143 (34.3) | 118 (38.8) | 12 (23.1) | 3 (5.8) | 0.00 | 116 (40.6) | 13 (15.1) | 3 (8.6) | 0.00 | 57 (34.8) | 76 (31.1) | 0.44 |
| high risk | 274 (65.7) | 186 (61.2) | 40 (76.9) | 49 (94.2) | 170 (59.4) | 73 (84.9) | 32 (91.4) | 107 (65.2) | 168 (68.9) |

**NB: percentages are from column total**

**Supplemental Table 2: Exploration of participants' age, family history, and weight status by knowledge and attitudes about non-communicable diseases.**

| **General NCD knowledge and attitude** | **Responses** | **Total**  **n (%)** | **Age** | | | | **Family history** | | | **Weight statuses** | | | |
| --- | --- | --- | --- | --- | --- | --- | --- | --- | --- | --- | --- | --- | --- |
| **18-40** | **41-55** | **56+** | **p-value** | **Yes** | **No** | **p-value** | **Normal** | **overweight** | **Obese** | **p-value** |
| A non-communicable disease is one that cannot be spread between people? | Yes | 362 (86.8) | 276 (88.5) | 43 (81.1) | 43 (82.7) | 0.22 | 140 (84.3) | 222 (88.8) | 0.18 | 254  (87.6) | 79 (90.8) | 26 (74.3) | 0.04 |
| Non-communicable diseases are less dangerous than communicable diseases? | Favours the statement | 316 (75.8) | 245 (78.5) | 37 (69.8) | 34 (65.4) | 0.07 | 116 (69.9) | 199 (79.6) | 0.02 | 231 (79.7) | 64 (73.6) | 17 (48.6) | 0.00 |
| **Hypertension knowledge and attitude** | | |  |  |  |  |  |  |  |  |  |  |  |
| How much do you know about hypertension? | Know about it***** | 290 (69.5) | 223 (71.5) | 34 (64.2) | 33 (63.5) | 0.33 | 117 (70.5) | 173 (69.2) | 0.78 | 214 (73.8) | 55 (63.2) | 18 (51.4) | 0.01 |
| Do you think high blood pressure cause health problems? | Yes | 391 (93.8) | 294 (94.2) | 49 (92.5) | 48 (92.3) | 0.79 | 153 (92.2) | 237 (94.8) | 0.27 | 274 (94.5) | 81 (93.1) | 31 (88.6) | 0.38 |
| How regularly do you think people should check their blood pressure? | Frequently | 222 (53.2) | 164 (52.6) | 29 (54.7) | 29 (55.8) | 0.88 | 104 (62.7) | 118 (47.2) | 0.02 | 150 (51.7) | 44 (50.6) | 24 (68.6) | 0.15 |
| Which of the following is/are effective to prevent hypertension? | Reduce salt intake | 387 (92.8) | 287 (92.0) | 51 (96.2) | 49 (94.2) | 0.49 | 149 (89.8) | 237 (94.8) | 0.05 | 269 (92.8) | 81 (93.1) | 32 (91.4) | 0.95 |
| Avoiding alcohol | 347 (83.2) | 265 (84.9) | 44 (83.0) | 38 (73.1) | 0.10 | 136 (81.9) | 211 (84.4) | 0.51 | 241 (83.1) | 75 (86.2) | 27 (77.1) | 0.47 |
| Quitting tobacco | 305 (73.1) | 227 (72.8) | 43 (81.1) | 35 (67.3) | 0.26 | 128 (77.1) | 177 (70.8) | 0.16 | 211 (72.8) | 67 (77.0) | 24 (68.6) | 0.59 |
| Physical exercise | 333 (79.9) | 250 (80.1) | 46 (86.8) | 37 (71.2) | 0.13 | 133 (80.1) | 200 (80.0) | 0.97 | 228 (78.6) | 73 (83.9) | 28 (80.0) | 0.56 |
| Weight loss | 324 (77.7) | 240 (76.9) | 45 (84.9) | 39 (75.0) | 0.38 | 126 (75.9) | 198 (79.2) | 0.42 | 219 (75.5) | 75 (86.2) | 26 (74.3) | 0.09 |
| **Cardiovascular knowledge and attitude** | | |  |  |  |  |  |  |  |  |  |  |  |
| How much do you know about cardiovascular diseases? | Know about it | 223 (53.5) | 173 (55.4) | 25 (47.2) | 25 (48.1) | 0.38 | 89 (53.6) | 134 (53.6) | 0.99 | 163 (56.2) | 42 (48.3) | 15 (42.9) | 0.18 |
| Have you ever concerned about developing cardiovascular diseases? | Yes | 157 (37.6) | 109 (34.9) | 18 (34.0) | 30 (57.7) | 0.01 | 72 (43.4) | 84 (33.6) | 0.04 | 107 (36.9) | 34 (39.1) | 15 (42.9) | 0.76 |
| Do you think cardiovascular diseases are preventable? | Yes | 276 (66.2) | 211 (67.6) | 34 (64.2) | 31 (59.6) | 0.49 | 109 (65.7) | 166 (66.4) | 0.87 | 197 (67.9) | 52 (59.8) | 23 (65.7) | 0.37 |
| Which of the following do you think would increases someone chance of getting cardiovascular diseases | Smoking | 315 (75.5) | 240 (76.9) | 39 (73.6) | 36 (69.2) | 0.46 | 117 (70.5) | 198 (79.2) | 0.04 | 221 (76.2) | 67 (77.0) | 23 (65.7) | 0.37 |
| Alcohol intake | 305 (73.1) | 227 (72.8) | 39 (73.6) | 39 (75.0) | 0.94 | 116 (69.9) | 189 (75.6) | 0.19 | 211 (72.8) | 65 (74.7) | 25 (71.4) | 0.91 |
| Physical inactivity | 296 (71.0) | 223 (71.5) | 39 (73.6) | 34 (65.4) | 0.60 | 114 (68.7) | 182 (72.8) | 0.36 | 208 (71.7) | 60 (69.0) | 25 (71.4) | 0.88 |
| Overweight | 326 (78.2) | 242 (77.6) | 41 (77.4) | 43 (82.7) | 0.70 | 118 (71.1) | 207 (82.8) | 0.01 | 223 (76.9) | 74 (85.1) | 26 (74.3) | 0.22 |
| Salty food | 315 (75.5) | 235 (75.3) | 42 (79.2) | 38 (73.1) | 0.75 | 113 (68.1) | 202 (80.8) | 0.01 | 219 (75.5) | 69 (79.3) | 24 (68.6) | 0.45 |
| Hypertension | 224 (53.7) | 164 (52.6) | 31 (58.5) | 29 (55.8) | 0.69 | 89 (53.6) | 135 (54.0) | 0.94 | 149 (51.4) | 53 (60.9) | 19 (54.3) | 0.29 |
| Stress | 319 (77.4) | 238 (76.3) | 41 (77.4) | 43 (82.7) | 0.59 | 129 (77.7) | 193 (77.2) | 0.90 | 220 (75.9) | 72 (82.8) | 27 (77.1) | 0.40 |
| **Cancer knowledge and attitude** | | |  |  |  |  |  |  |  |  |  |  |  |
| How much do you know about cancer? | Know about it | 231 (55.4) | 184 (59.0) | 25 (47.2) | 22 (42.3) | 0.03 | 57 (34.3) | 77 (30.8) | 0.45 | 91 (31.4) | 28 (32.2) | 14 (40.0) | 0.58 |
| Do you worry about cancer affect you or your family? | Yes | 135 (32.3) | 98 (31.4) | 16 (30.2) | 21 (40.4) | 0.41 | 84 (50.6) | 147 (58.8) | 0.09 | 169 (58.3) | 44 (50.6) | 15 (42.9) | 0.13 |
| **Diabetes knowledge and attitude** | | |  |  |  |  |  |  |  |  |  |  |  |
| How much do you know about diabetes? | Know about it | 302 (72.4) | 225 (72.8) | 33 (62.3) | 42 (80.8) | 0.10 | 123 (74.5) | 176 (71.0) | 0.42 | 222 (76.8) | 51 (60.0) | 24 (68.6) | 0.08 |
| Do you think diabetes is preventable? | Yes | 314 (75.3) | 239 (76.6) | 36 (67.9) | 39 (75.0) |  | 121 (72.9) | 192 (76.8) | 0.36 | 226 (77.9) | 59 (67.8) | 25 (71.4) | 0.13 |
| Which of these things can a person do to reduce their chances of getting diabetes? | Changing dietary habit | 386 (92.6) | 289 (92.6) | 46 (86.8) | 51 (98.1) | 0.08 | 149 (89.8) | 237 (94.8) | 0.05 | 268 (92.4) | 82 (94.3) | 31 (88.6) | 0.56 |
| Physical activity | 349 (83.7) | 270 (86.5) | 41 (77.4) | 38 (73.1) | 0.02 | 130 (78.3) | 218 (87.2) | 0.16 | 239 (82.4) | 78 (89.7) | 28 (80.0) | 0.23 |
| Losing weight | 357 (85.6) | 271 (86.9) | 44 (83.0) | 42 (80.8) | 0.43 | 138 (83.1) | 219 (87.6) | 0.20 | 246 (84.8) | 81 (93.1) | 27 (77.1) | 0.04 |
| Quitting smoking | 286 (68.6) | 219 (70.2) | 34 (64.2) | 33 (63.5) | 0.47 | 113 (68.1) | 173 (69.2) | 0.80 | 195 (67.2) | 67 (77.0) | 21 (60.0) | 0.11 |
| Avoiding alcohol use | 299 (71.7) | 228 (73.1) | 36 (67.9) | 35 (67.3) | 0.56 | 118 (71.1) | 181 (72.4) | 0.77 | 204 (70.3) | 69 (79.3) | 23 (65.7) | 0.18 |
| Diabetes knowledge (using diabetes knowledge scale) | Adequate | 371 (89.2) | 276 (88.7) | 47 (88.7) | 48 (92.3) | 0.70 | 146 (88.0) | 224 (90.0) | 0.52 | 267 (92.1) | 69 (80.2) | 31 (88.6) | 0.01 |
| **Overall, awareness about non-communicable diseases** | Know some about NCDs | 144 (39.2) | 116 (37.2) | 13 (24.5) | 15 (28.8) | 0.13 | 56 (33.7) | 88 (35.2) | 0.75 | 111 (38.3) | 24 (27.6) | 8 (22.9) | 0.06 |
